# Supplementary material
Source: publisher figshare collection journal article supplement (https://acs.figshare.com/ndownloader/files/4769305)
Supplement: Supplementary file 1 [file 4769305]

data_publication_text
_publ_requested_journal          'JACS'
_publ_contact_author_name        'Randolf Dag K\"ohn'
_publ_contact_author_address     
;Department of Chemistry
University of Bath
Bath, BA2 7AY
United Kingdom
;
_publ_contact_author_email       'r.d.kohn@bath.ac.uk'
_publ_contact_author_phone       '# 44 1225 38 3305'
_publ_contact_author_fax         '# 44 1225 82 6231'
_publ_requested_coeditor_name     

;
 Matthias Haufe, Gabriele Kociok-K\"ohn
;

_publ_section_title
;
 Observation of Intramolecular Paramagnetic T1 Spin Decoupling 
 in the 13C NMR Spectra of Triazacyclohexane Complexes of Ni(II)
;

loop_
 _publ_author_name
 _publ_author_address
       'Randolf Dag K\"ohn'
;       University of Bath
        Department of Chemistry
        Bath, BA2 7AY 
        United Kingdom
;
       'Matthias Haufe'
;       Continental AG Hannover
        Dept. 61021 CTT TC
        Jaedekamp 30,
        D-30419 Hannover, 
        Germany
;
       'Gabriele Kociok-K\"ohn'
;       University of Bath
        Department of Chemistry
        Bath, BA2 7AY 
        United Kingdom
;


#============================================================================== 

 
data_k05rdk13
 
_audit_creation_method            SHELXL-97
_chemical_name_systematic
;
 ?
;
_chemical_name_common             ?
_chemical_melting_point           ?
_chemical_formula_moiety         
'C30 H33 F3 N6 Zn 1+,B2 F8 1-'
_chemical_formula_sum
 'C30 H33 B2 F11 N6 Zn'
_chemical_formula_weight          773.61
 
loop_
 _atom_type_symbol
 _atom_type_description
 _atom_type_scat_dispersion_real
 _atom_type_scat_dispersion_imag
 _atom_type_scat_source
 'C'  'C'   0.0033   0.0016
 'International Tables Vol C Tables 4.2.6.8 and 6.1.1.4'
 'H'  'H'   0.0000   0.0000
 'International Tables Vol C Tables 4.2.6.8 and 6.1.1.4'
 'N'  'N'   0.0061   0.0033
 'International Tables Vol C Tables 4.2.6.8 and 6.1.1.4'
 'B'  'B'   0.0013   0.0007
 'International Tables Vol C Tables 4.2.6.8 and 6.1.1.4'
 'F'  'F'   0.0171   0.0103
 'International Tables Vol C Tables 4.2.6.8 and 6.1.1.4'
 'Zn'  'Zn'   0.2839   1.4301
 'International Tables Vol C Tables 4.2.6.8 and 6.1.1.4'
 
_symmetry_cell_setting            triclinic
_symmetry_space_group_name_H-M    'P -1'
 
loop_
 _symmetry_equiv_pos_as_xyz
 'x, y, z'
 '-x, -y, -z'
 
_cell_length_a                    10.7380(2)
_cell_length_b                    11.7460(2)
_cell_length_c                    14.6580(2)
_cell_angle_alpha                 105.6230(6)
_cell_angle_beta                  91.1820(6)
_cell_angle_gamma                 100.0630(5)
_cell_volume                      1748.62(5)
_cell_formula_units_Z             2
_cell_measurement_temperature     150(2)
_cell_measurement_reflns_used     31073
_cell_measurement_theta_min        2.910
_cell_measurement_theta_max       27.485
 
_exptl_crystal_description        block
_exptl_crystal_colour             colourless
_exptl_crystal_size_max           0.50
_exptl_crystal_size_mid           0.35
_exptl_crystal_size_min           0.30
_exptl_crystal_density_diffrn     1.469
_exptl_crystal_density_method     'not measured'
_exptl_crystal_F_000              788
_exptl_absorpt_coefficient_mu     0.792
_exptl_absorpt_correction_type    none
 
_exptl_special_details
;
 ?
;
 
_diffrn_ambient_temperature       150(2)
_diffrn_radiation_wavelength      0.71073
_diffrn_radiation_type            MoK\a
_diffrn_radiation_source          'fine-focus sealed tube'
_diffrn_radiation_monochromator   graphite
_diffrn_measurement_device_type   'Nonius Kappa CCD'
_diffrn_measurement_method        
'404 1.5 degree images with \f and \w scans' 
_diffrn_standards_number          0
_diffrn_standards_decay_%         0
_diffrn_reflns_number             29102
_diffrn_reflns_av_R_equivalents   0.0367
_diffrn_reflns_av_sigmaI/netI     0.0352
_diffrn_reflns_limit_h_min        -13
_diffrn_reflns_limit_h_max        13
_diffrn_reflns_limit_k_min        -15
_diffrn_reflns_limit_k_max        15
_diffrn_reflns_limit_l_min        -19
_diffrn_reflns_limit_l_max        19
_diffrn_reflns_theta_min          2.99
_diffrn_reflns_theta_max          27.51
_reflns_number_total              7929
_reflns_number_gt                 6977
_reflns_threshold_expression      >2sigma(I)
 
_computing_data_collection        
'Collect, Nonius program suite version 1.9 (1997)'
_computing_cell_refinement        
'Collect, Nonius program suite version 1.9 (1997)'
_computing_data_reduction         
'Denzo and Scalepack (Otwinowski & Minor, 1997)'
_computing_structure_solution     
; 
 SIR97- Altomare A., Burla M.C., Camalli M., Cascarano G.L., Giacovazzo C. , 
 Guagliardi A., Moliterni A.G.G., Polidori G.,Spagna R. 
 (1999) J. Appl. Cryst. 32, 115-119.
;

_computing_structure_refinement   
;
 SHELX97-2 Program for Crystal Structure Analysis. G. M. Sheldrick,
 Institut f. Anorg. Chemie der Universit\"at, Tammanstrasse 4, 
 D-3400 G\"ottingen, Germany, 1998.
;

_computing_molecular_graphics     
'ORTEP3 for Windows - L. J. Farrugia, J. Appl. Crystallogr. 1997, 30, 565'
_computing_publication_material   'SHELX97-2, G. M. Sheldrick' 
 
_refine_special_details
;
 Refinement of F^2^ against ALL reflections.  The weighted R-factor wR and
 goodness of fit S are based on F^2^, conventional R-factors R are based
 on F, with F set to zero for negative F^2^. The threshold expression of
 F^2^ > 2sigma(F^2^) is used only for calculating R-factors(gt) etc. and is
 not relevant to the choice of reflections for refinement.  R-factors based
 on F^2^ are statistically about twice as large as those based on F, and R-
 factors based on ALL data will be even larger.
;
 
_refine_ls_structure_factor_coef  Fsqd
_refine_ls_matrix_type            full
_refine_ls_weighting_scheme       calc
_refine_ls_weighting_details
 'calc w=1/[\s^2^(Fo^2^)+(0.0523P)^2^+1.0833P] where P=(Fo^2^+2Fc^2^)/3'
_atom_sites_solution_primary      direct
_atom_sites_solution_secondary    difmap
_atom_sites_solution_hydrogens    geom
_refine_ls_hydrogen_treatment     noref
_refine_ls_extinction_method      none
_refine_ls_number_reflns          7929
_refine_ls_number_parameters      561
_refine_ls_number_restraints      0
_refine_ls_R_factor_all           0.0499
_refine_ls_R_factor_gt            0.0405
_refine_ls_wR_factor_ref          0.1057
_refine_ls_wR_factor_gt           0.1000
_refine_ls_goodness_of_fit_ref    1.030
_refine_ls_restrained_S_all       1.030
_refine_ls_shift/su_max           0.002
_refine_ls_shift/su_mean          0.000
 
loop_
 _atom_site_label
 _atom_site_type_symbol
 _atom_site_fract_x
 _atom_site_fract_y
 _atom_site_fract_z
 _atom_site_U_iso_or_equiv
 _atom_site_adp_type
 _atom_site_occupancy
 _atom_site_symmetry_multiplicity
 _atom_site_calc_flag
 _atom_site_refinement_flags
 _atom_site_disorder_assembly
 _atom_site_disorder_group
Zn Zn 0.77124(2) 0.218189(18) 0.712692(15) 0.02750(8) Uani 1 1 d . . .
C1 C 1.01595(18) 0.34330(17) 0.74835(13) 0.0281(4) Uani 1 1 d . . .
H1A H 1.0759 0.4175 0.7825 0.034 Uiso 1 1 calc R A .
H1B H 1.0638 0.2869 0.7075 0.034 Uiso 1 1 calc R . .
N1 N 0.91656(15) 0.37100(13) 0.69160(10) 0.0262(3) Uani 1 1 d . A .
C11 C 0.9586(2) 0.40054(18) 0.60384(13) 0.0310(4) Uani 1 1 d . . .
H11A H 0.8846 0.4134 0.5691 0.037 Uiso 1 1 calc R A .
H11B H 0.9891 0.3306 0.5628 0.037 Uiso 1 1 calc R . .
C12 C 1.0622(2) 0.51027(18) 0.61980(13) 0.0335(4) Uani 1 1 d . A .
C13 C 1.1883(2) 0.5017(2) 0.61825(16) 0.0424(5) Uani 1 1 d . . .
C14 C 1.2867(3) 0.5989(3) 0.63304(19) 0.0538(6) Uani 1 1 d . A .
H14 H 1.3725 0.5885 0.6313 0.065 Uiso 1 1 calc R . .
C15 C 1.2561(3) 0.7122(2) 0.65059(17) 0.0556(7) Uani 1 1 d . . .
H15 H 1.3218 0.7809 0.6609 0.067 Uiso 1 1 calc R A .
C16 C 1.1312(3) 0.7265(2) 0.65327(16) 0.0491(6) Uani 1 1 d . A .
H16 H 1.1116 0.8049 0.6661 0.059 Uiso 1 1 calc R . .
C17 C 1.0339(2) 0.62661(19) 0.63727(14) 0.0403(5) Uani 1 1 d . . .
H17 H 0.9481 0.6369 0.6381 0.048 Uiso 1 1 calc R A .
F11 F 1.21757(14) 0.39020(14) 0.60219(12) 0.0572(4) Uani 1 1 d . A .
C2 C 0.85314(19) 0.46221(16) 0.75161(12) 0.0281(4) Uani 1 1 d . . .
H2A H 0.7912 0.4864 0.7130 0.034 Uiso 1 1 calc R A .
H2B H 0.9157 0.5345 0.7857 0.034 Uiso 1 1 calc R . .
N2 N 0.78853(15) 0.40271(13) 0.81892(10) 0.0265(3) Uani 1 1 d . A .
C21 C 0.7020(2) 0.47648(17) 0.87389(14) 0.0331(4) Uani 1 1 d . . .
H21A H 0.6492 0.5020 0.8297 0.040 Uiso 1 1 calc R A .
H21B H 0.7529 0.5499 0.9179 0.040 Uiso 1 1 calc R . .
C22 C 0.61659(19) 0.40884(16) 0.93008(14) 0.0304(4) Uani 1 1 d . A .
C23 C 0.6460(2) 0.41743(18) 1.02412(14) 0.0341(4) Uani 1 1 d . . .
C25 C 0.4554(2) 0.2880(2) 1.0356(2) 0.0470(6) Uani 1 1 d . . .
H25 H 0.4003 0.2470 1.0712 0.056 Uiso 1 1 calc R A .
C24 C 0.5687(2) 0.3588(2) 1.07788(17) 0.0434(5) Uani 1 1 d . A .
H24 H 0.5930 0.3671 1.1424 0.052 Uiso 1 1 calc R . .
C26 C 0.4213(2) 0.2760(2) 0.9414(2) 0.0459(6) Uani 1 1 d . A .
H26 H 0.3431 0.2268 0.9124 0.055 Uiso 1 1 calc R . .
C27 C 0.5015(2) 0.33624(18) 0.88914(16) 0.0370(4) Uani 1 1 d . . .
H27 H 0.4775 0.3277 0.8246 0.044 Uiso 1 1 calc R A .
F21 F 0.75770(13) 0.48828(13) 1.06647(9) 0.0486(3) Uani 1 1 d . A .
C3 C 0.88352(18) 0.37585(16) 0.87972(12) 0.0269(4) Uani 1 1 d . . .
H3A H 0.9456 0.4496 0.9115 0.032 Uiso 1 1 calc R A .
H3B H 0.8423 0.3419 0.9289 0.032 Uiso 1 1 calc R . .
N3 N 0.94602(14) 0.28763(13) 0.81566(10) 0.0254(3) Uani 1 1 d . A .
C31 C 1.02942(18) 0.23271(19) 0.86652(15) 0.0329(4) Uani 1 1 d . . .
H31A H 1.0933 0.2972 0.9092 0.039 Uiso 1 1 calc R A .
H31B H 1.0751 0.1804 0.8198 0.039 Uiso 1 1 calc R . .
C32 C 0.95501(17) 0.15932(17) 0.92417(13) 0.0273(4) Uani 1 1 d . A .
C33 C 0.9364(2) 0.20712(18) 1.01858(14) 0.0354(4) Uani 1 1 d . . .
C34 C 0.8693(2) 0.1424(2) 1.07355(16) 0.0443(5) Uani 1 1 d . A .
H34 H 0.8578 0.1794 1.1381 0.053 Uiso 1 1 calc R . .
C35 C 0.8198(2) 0.0228(2) 1.03192(18) 0.0449(5) Uani 1 1 d . . .
H35 H 0.7738 -0.0241 1.0681 0.054 Uiso 1 1 calc R A .
C36 C 0.8367(2) -0.02944(19) 0.93774(18) 0.0407(5) Uani 1 1 d . A .
H36 H 0.8025 -0.1121 0.9094 0.049 Uiso 1 1 calc R . .
C37 C 0.90329(19) 0.03874(18) 0.88468(15) 0.0325(4) Uani 1 1 d . . .
H37 H 0.9138 0.0021 0.8198 0.039 Uiso 1 1 calc R A .
F31 F 0.98740(17) 0.32517(12) 1.06012(10) 0.0580(4) Uani 1 1 d . A .
N4 N 0.84001(17) 0.07562(16) 0.62828(12) 0.0357(4) Uani 1 1 d . A .
C4 C 0.8649(2) -0.01384(19) 0.58939(14) 0.0342(4) Uani 1 1 d . . .
C5 C 0.8967(3) -0.1284(2) 0.53845(17) 0.0463(5) Uani 1 1 d . A .
H5A H 0.8659 -0.1487 0.4716 0.069 Uiso 1 1 calc R . .
H5B H 0.8567 -0.1914 0.5665 0.069 Uiso 1 1 calc R . .
H5C H 0.9889 -0.1224 0.5429 0.069 Uiso 1 1 calc R . .
N5 N 0.625(2) 0.230(3) 0.6167(19) 0.033(2) Uani 0.50 1 d P A 1
C6 C 0.5535(8) 0.2039(8) 0.5576(6) 0.052(2) Uani 0.50 1 d P A 1
C7 C 0.4495(7) 0.1761(13) 0.4855(6) 0.112(4) Uani 0.50 1 d P A 1
H7A H 0.4624 0.1091 0.4322 0.168 Uiso 0.50 1 calc PR A 1
H7B H 0.4466 0.2470 0.4629 0.168 Uiso 0.50 1 calc PR A 1
H7C H 0.3694 0.1536 0.5127 0.168 Uiso 0.50 1 calc PR A 1
N5A N 0.649(2) 0.239(3) 0.623(2) 0.045(4) Uani 0.50 1 d P A 2
C6A C 0.5610(9) 0.2626(8) 0.5842(6) 0.055(2) Uani 0.50 1 d P A 2
C7A C 0.4601(9) 0.2878(14) 0.5295(8) 0.130(5) Uani 0.50 1 d P A 2
H7D H 0.4686 0.2540 0.4616 0.194 Uiso 0.50 1 calc PR A 2
H7E H 0.4658 0.3751 0.5435 0.194 Uiso 0.50 1 calc PR A 2
H7F H 0.3778 0.2514 0.5465 0.194 Uiso 0.50 1 calc PR A 2
N6 N 0.65635(16) 0.11602(15) 0.78206(12) 0.0335(4) Uani 1 1 d . A .
C8 C 0.59097(19) 0.05147(18) 0.81180(14) 0.0323(4) Uani 1 1 d . . .
C9 C 0.5071(2) -0.0315(2) 0.8510(2) 0.0519(6) Uani 1 1 d . A .
H9A H 0.5227 -0.1132 0.8243 0.078 Uiso 1 1 calc R . .
H9B H 0.4188 -0.0289 0.8350 0.078 Uiso 1 1 calc R . .
H9C H 0.5232 -0.0082 0.9202 0.078 Uiso 1 1 calc R . .
B1 B 0.7334(9) 0.9403(9) 0.3233(7) 0.037(3) Uiso 0.50 1 d P B 1
B2 B 0.3071(11) 0.2820(10) 0.2939(10) 0.033(2) Uani 0.50 1 d P C 1
F1 F 0.7260(12) 0.8157(7) 0.3107(9) 0.094(3) Uani 0.50 1 d P B 1
F2 F 0.6320(5) 0.9809(6) 0.3486(5) 0.0986(18) Uani 0.50 1 d P B 1
F3 F 0.7349(14) 0.9723(9) 0.2529(4) 0.157(5) Uani 0.50 1 d P B 1
F4 F 0.8313(8) 0.9991(6) 0.3858(5) 0.115(3) Uani 0.50 1 d P B 1
F5 F 0.2472(8) 0.2961(5) 0.2200(4) 0.0554(14) Uani 0.50 1 d P C 1
F6 F 0.4260(5) 0.3109(6) 0.2645(5) 0.120(2) Uani 0.50 1 d P C 1
F7 F 0.3043(9) 0.3763(6) 0.3752(5) 0.098(3) Uani 0.50 1 d P C 1
F8 F 0.2904(5) 0.1736(3) 0.3042(3) 0.0764(11) Uani 0.50 1 d P C 1
B1A B 0.7447(10) 0.9275(9) 0.3157(7) 0.039(3) Uiso 0.50 1 d P D 2
B2A B 0.3361(11) 0.3182(11) 0.3037(10) 0.042(3) Uani 0.50 1 d P E 2
F1A F 0.8649(5) 0.9561(7) 0.3385(5) 0.110(3) Uani 0.50 1 d P D 2
F2A F 0.7015(12) 0.8131(9) 0.3055(11) 0.113(4) Uani 0.50 1 d P D 2
F3A F 0.7414(8) 0.9550(8) 0.2263(4) 0.0807(17) Uani 0.50 1 d P D 2
F4A F 0.6931(10) 0.9922(7) 0.3962(4) 0.137(3) Uani 0.50 1 d P D 2
F5A F 0.2234(11) 0.2821(10) 0.2369(7) 0.155(5) Uani 0.50 1 d P E 2
F6A F 0.4090(8) 0.2372(7) 0.2981(6) 0.161(4) Uani 0.50 1 d P E 2
F7A F 0.4153(6) 0.4253(8) 0.3019(6) 0.144(3) Uani 0.50 1 d P E 2
F8A F 0.2841(9) 0.3533(9) 0.3837(6) 0.105(3) Uani 0.50 1 d P E 2
 
loop_
 _atom_site_aniso_label
 _atom_site_aniso_U_11
 _atom_site_aniso_U_22
 _atom_site_aniso_U_33
 _atom_site_aniso_U_23
 _atom_site_aniso_U_13
 _atom_site_aniso_U_12
Zn 0.02927(13) 0.02302(12) 0.02779(12) 0.00476(8) 0.00061(8) 0.00224(8)
C1 0.0282(9) 0.0302(9) 0.0257(8) 0.0098(7) 0.0035(7) 0.0013(7)
N1 0.0322(8) 0.0239(7) 0.0215(7) 0.0065(6) 0.0046(6) 0.0018(6)
C11 0.0409(11) 0.0305(10) 0.0200(8) 0.0072(7) 0.0040(7) 0.0015(8)
C12 0.0458(11) 0.0326(10) 0.0201(8) 0.0095(7) 0.0050(8) -0.0016(8)
C13 0.0501(13) 0.0395(12) 0.0368(11) 0.0134(9) 0.0090(9) 0.0012(10)
C14 0.0465(14) 0.0595(16) 0.0519(14) 0.0209(12) 0.0066(11) -0.0082(12)
C15 0.0711(18) 0.0446(14) 0.0405(12) 0.0135(11) -0.0010(12) -0.0191(12)
C16 0.0770(18) 0.0336(11) 0.0333(11) 0.0122(9) 0.0029(11) -0.0032(11)
C17 0.0612(14) 0.0331(11) 0.0259(9) 0.0122(8) 0.0049(9) 0.0006(10)
F11 0.0482(8) 0.0511(8) 0.0772(10) 0.0232(8) 0.0195(7) 0.0119(7)
C2 0.0393(10) 0.0222(9) 0.0235(8) 0.0080(7) 0.0071(7) 0.0041(7)
N2 0.0334(8) 0.0225(7) 0.0242(7) 0.0072(6) 0.0060(6) 0.0052(6)
C21 0.0418(11) 0.0265(9) 0.0341(10) 0.0104(8) 0.0137(8) 0.0105(8)
C22 0.0354(10) 0.0224(9) 0.0347(10) 0.0078(7) 0.0113(8) 0.0082(7)
C23 0.0360(10) 0.0303(10) 0.0349(10) 0.0079(8) 0.0076(8) 0.0043(8)
C25 0.0446(13) 0.0336(11) 0.0725(16) 0.0266(11) 0.0279(12) 0.0121(10)
C24 0.0538(14) 0.0427(12) 0.0423(12) 0.0202(10) 0.0201(10) 0.0165(10)
C26 0.0321(11) 0.0291(11) 0.0751(17) 0.0122(11) 0.0113(11) 0.0050(8)
C27 0.0344(10) 0.0303(10) 0.0450(11) 0.0055(9) 0.0040(9) 0.0105(8)
F21 0.0479(8) 0.0532(8) 0.0347(6) 0.0040(6) 0.0019(6) -0.0042(6)
C3 0.0331(9) 0.0246(9) 0.0216(8) 0.0064(7) 0.0032(7) 0.0017(7)
N3 0.0272(7) 0.0247(7) 0.0246(7) 0.0085(6) 0.0037(6) 0.0032(6)
C31 0.0277(9) 0.0376(11) 0.0371(10) 0.0179(9) 0.0009(8) 0.0045(8)
C32 0.0264(9) 0.0271(9) 0.0299(9) 0.0112(7) -0.0016(7) 0.0044(7)
C33 0.0471(12) 0.0270(10) 0.0304(9) 0.0081(8) -0.0053(8) 0.0034(8)
C34 0.0572(14) 0.0520(14) 0.0322(10) 0.0197(10) 0.0100(10) 0.0195(11)
C35 0.0375(11) 0.0509(14) 0.0598(14) 0.0368(12) 0.0111(10) 0.0097(10)
C36 0.0337(11) 0.0296(10) 0.0605(14) 0.0196(10) -0.0072(10) 0.0004(8)
C37 0.0337(10) 0.0282(9) 0.0350(10) 0.0078(8) -0.0051(8) 0.0071(8)
F31 0.0953(12) 0.0324(7) 0.0368(7) 0.0026(5) -0.0151(7) 0.0004(7)
N4 0.0387(9) 0.0301(9) 0.0343(9) 0.0021(7) 0.0027(7) 0.0062(7)
C4 0.0349(10) 0.0324(10) 0.0333(10) 0.0065(8) 0.0027(8) 0.0048(8)
C5 0.0561(14) 0.0351(12) 0.0467(13) 0.0032(10) 0.0070(11) 0.0184(10)
N5 0.015(7) 0.050(4) 0.035(3) 0.020(3) -0.010(4) -0.002(5)
C6 0.037(3) 0.083(6) 0.040(4) 0.028(4) 0.004(3) 0.000(4)
C7 0.044(4) 0.228(13) 0.061(5) 0.063(6) -0.018(3) -0.014(6)
N5A 0.021(9) 0.061(7) 0.053(7) 0.021(5) -0.004(5) 0.001(6)
C6A 0.039(4) 0.091(6) 0.046(4) 0.033(4) 0.009(3) 0.024(5)
C7A 0.063(5) 0.274(16) 0.111(8) 0.122(10) 0.019(5) 0.080(9)
N6 0.0322(8) 0.0290(8) 0.0389(9) 0.0090(7) 0.0030(7) 0.0056(7)
C8 0.0305(10) 0.0299(10) 0.0370(10) 0.0083(8) 0.0033(8) 0.0081(8)
C9 0.0455(13) 0.0519(14) 0.0655(16) 0.0304(13) 0.0159(12) 0.0048(11)
B2 0.030(5) 0.032(5) 0.032(3) 0.009(3) 0.004(3) -0.005(3)
F1 0.162(9) 0.047(4) 0.085(5) 0.028(3) 0.009(5) 0.041(5)
F2 0.064(3) 0.143(5) 0.126(5) 0.081(4) 0.040(3) 0.045(3)
F3 0.384(14) 0.063(3) 0.019(3) 0.011(3) -0.027(4) 0.032(5)
F4 0.143(7) 0.079(4) 0.110(5) 0.054(4) -0.090(5) -0.045(4)
F5 0.104(4) 0.038(2) 0.0324(16) 0.0153(16) -0.006(2) 0.027(2)
F6 0.078(3) 0.109(4) 0.151(5) 0.010(4) 0.079(4) -0.009(3)
F7 0.171(8) 0.075(3) 0.044(3) -0.022(3) -0.028(4) 0.076(4)
F8 0.127(4) 0.056(2) 0.059(2) 0.0399(17) 0.012(2) 0.016(2)
B2A 0.028(5) 0.060(8) 0.045(5) 0.030(6) 0.004(4) 0.008(4)
F1A 0.045(2) 0.121(5) 0.142(6) 0.005(4) -0.035(3) 0.005(3)
F2A 0.121(5) 0.072(5) 0.131(7) 0.051(5) -0.043(5) -0.048(4)
F3A 0.150(5) 0.084(4) 0.013(3) 0.018(3) -0.001(2) 0.029(3)
F4A 0.206(9) 0.150(6) 0.072(4) 0.013(4) 0.052(4) 0.099(7)
F5A 0.132(7) 0.141(8) 0.152(8) -0.061(5) -0.067(6) 0.088(6)
F6A 0.162(6) 0.122(5) 0.176(7) -0.040(5) -0.091(5) 0.107(5)
F7A 0.092(4) 0.191(7) 0.166(6) 0.105(6) -0.030(4) -0.011(4)
F8A 0.074(3) 0.187(8) 0.062(4) 0.043(4) 0.030(3) 0.029(4)
 
_geom_special_details
;
 All esds (except the esd in the dihedral angle between two l.s. planes)
 are estimated using the full covariance matrix.  The cell esds are taken
 into account individually in the estimation of esds in distances, angles
 and torsion angles; correlations between esds in cell parameters are only
 used when they are defined by crystal symmetry.  An approximate (isotropic)
 treatment of cell esds is used for estimating esds involving l.s. planes.
;
 
loop_
 _geom_bond_atom_site_label_1
 _geom_bond_atom_site_label_2
 _geom_bond_distance
 _geom_bond_site_symmetry_2
 _geom_bond_publ_flag
Zn N5A 1.93(3) . ?
Zn N6 2.0464(17) . ?
Zn N4 2.0578(17) . ?
Zn N5 2.13(2) . ?
Zn N1 2.2566(15) . ?
Zn N3 2.2696(15) . ?
Zn N2 2.2773(15) . ?
C1 N1 1.472(2) . ?
C1 N3 1.474(2) . ?
C1 H1A 0.9900 . ?
C1 H1B 0.9900 . ?
N1 C2 1.469(2) . ?
N1 C11 1.480(2) . ?
C11 C12 1.510(3) . ?
C11 H11A 0.9900 . ?
C11 H11B 0.9900 . ?
C12 C13 1.376(3) . ?
C12 C17 1.409(3) . ?
C13 F11 1.360(3) . ?
C13 C14 1.379(3) . ?
C14 C15 1.385(4) . ?
C14 H14 0.9500 . ?
C15 C16 1.380(4) . ?
C15 H15 0.9500 . ?
C16 C17 1.392(3) . ?
C16 H16 0.9500 . ?
C17 H17 0.9500 . ?
C2 N2 1.474(2) . ?
C2 H2A 0.9900 . ?
C2 H2B 0.9900 . ?
N2 C3 1.470(2) . ?
N2 C21 1.483(2) . ?
C21 C22 1.510(3) . ?
C21 H21A 0.9900 . ?
C21 H21B 0.9900 . ?
C22 C23 1.381(3) . ?
C22 C27 1.393(3) . ?
C23 F21 1.364(2) . ?
C23 C24 1.380(3) . ?
C25 C24 1.376(4) . ?
C25 C26 1.385(4) . ?
C25 H25 0.9500 . ?
C24 H24 0.9500 . ?
C26 C27 1.391(3) . ?
C26 H26 0.9500 . ?
C27 H27 0.9500 . ?
C3 N3 1.467(2) . ?
C3 H3A 0.9900 . ?
C3 H3B 0.9900 . ?
N3 C31 1.486(2) . ?
C31 C32 1.508(3) . ?
C31 H31A 0.9900 . ?
C31 H31B 0.9900 . ?
C32 C33 1.379(3) . ?
C32 C37 1.386(3) . ?
C33 F31 1.364(2) . ?
C33 C34 1.381(3) . ?
C34 C35 1.376(4) . ?
C34 H34 0.9500 . ?
C35 C36 1.381(4) . ?
C35 H35 0.9500 . ?
C36 C37 1.384(3) . ?
C36 H36 0.9500 . ?
C37 H37 0.9500 . ?
N4 C4 1.132(3) . ?
C4 C5 1.454(3) . ?
C5 H5A 0.9800 . ?
C5 H5B 0.9800 . ?
C5 H5C 0.9800 . ?
N5 C6 1.09(3) . ?
C6 C7 1.452(11) . ?
C7 H7A 0.9800 . ?
C7 H7B 0.9800 . ?
C7 H7C 0.9800 . ?
N5A C6A 1.20(3) . ?
C6A C7A 1.452(12) . ?
C7A H7D 0.9800 . ?
C7A H7E 0.9800 . ?
C7A H7F 0.9800 . ?
N6 C8 1.124(3) . ?
C8 C9 1.451(3) . ?
C9 H9A 0.9800 . ?
C9 H9B 0.9800 . ?
C9 H9C 0.9800 . ?
B1 F3 1.189(13) . ?
B1 F2 1.286(11) . ?
B1 F4 1.337(11) . ?
B1 F1 1.413(12) . ?
B2 F8 1.305(12) . ?
B2 F5 1.311(15) . ?
B2 F6 1.371(12) . ?
B2 F7 1.396(13) . ?
B1A F1A 1.288(12) . ?
B1A F2A 1.310(14) . ?
B1A F4A 1.402(11) . ?
B1A F3A 1.433(12) . ?
B2A F8A 1.305(17) . ?
B2A F6A 1.322(15) . ?
B2A F7A 1.397(12) . ?
B2A F5A 1.467(16) . ?
 
loop_
 _geom_angle_atom_site_label_1
 _geom_angle_atom_site_label_2
 _geom_angle_atom_site_label_3
 _geom_angle
 _geom_angle_site_symmetry_1
 _geom_angle_site_symmetry_3
 _geom_angle_publ_flag
N5A Zn N6 100.6(8) . . ?
N5A Zn N4 100.0(12) . . ?
N6 Zn N4 94.82(7) . . ?
N5A Zn N5 4.8(14) . . ?
N6 Zn N5 95.9(6) . . ?
N4 Zn N5 99.6(9) . . ?
N5A Zn N1 92.3(8) . . ?
N6 Zn N1 159.01(6) . . ?
N4 Zn N1 99.20(6) . . ?
N5 Zn N1 97.1(7) . . ?
N5A Zn N3 151.8(10) . . ?
N6 Zn N3 101.51(6) . . ?
N4 Zn N3 95.23(6) . . ?
N5 Zn N3 156.0(8) . . ?
N1 Zn N3 61.84(5) . . ?
N5A Zn N2 97.3(12) . . ?
N6 Zn N2 99.82(6) . . ?
N4 Zn N2 154.76(7) . . ?
N5 Zn N2 99.2(9) . . ?
N1 Zn N2 61.80(5) . . ?
N3 Zn N2 61.83(6) . . ?
N1 C1 N3 104.29(14) . . ?
N1 C1 H1A 110.9 . . ?
N3 C1 H1A 110.9 . . ?
N1 C1 H1B 110.9 . . ?
N3 C1 H1B 110.9 . . ?
H1A C1 H1B 108.9 . . ?
C2 N1 C1 110.38(14) . . ?
C2 N1 C11 112.96(14) . . ?
C1 N1 C11 114.68(15) . . ?
C2 N1 Zn 92.44(10) . . ?
C1 N1 Zn 92.23(10) . . ?
C11 N1 Zn 130.86(12) . . ?
N1 C11 C12 114.66(15) . . ?
N1 C11 H11A 108.6 . . ?
C12 C11 H11A 108.6 . . ?
N1 C11 H11B 108.6 . . ?
C12 C11 H11B 108.6 . . ?
H11A C11 H11B 107.6 . . ?
C13 C12 C17 116.9(2) . . ?
C13 C12 C11 121.79(19) . . ?
C17 C12 C11 121.4(2) . . ?
F11 C13 C12 117.72(19) . . ?
F11 C13 C14 118.1(2) . . ?
C12 C13 C14 124.2(2) . . ?
C13 C14 C15 117.7(3) . . ?
C13 C14 H14 121.2 . . ?
C15 C14 H14 121.2 . . ?
C16 C15 C14 120.8(2) . . ?
C16 C15 H15 119.6 . . ?
C14 C15 H15 119.6 . . ?
C15 C16 C17 120.3(2) . . ?
C15 C16 H16 119.9 . . ?
C17 C16 H16 119.9 . . ?
C16 C17 C12 120.2(2) . . ?
C16 C17 H17 119.9 . . ?
C12 C17 H17 119.9 . . ?
N1 C2 N2 104.59(14) . . ?
N1 C2 H2A 110.8 . . ?
N2 C2 H2A 110.8 . . ?
N1 C2 H2B 110.8 . . ?
N2 C2 H2B 110.8 . . ?
H2A C2 H2B 108.9 . . ?
C3 N2 C2 109.46(14) . . ?
C3 N2 C21 112.90(14) . . ?
C2 N2 C21 110.83(14) . . ?
C3 N2 Zn 91.60(10) . . ?
C2 N2 Zn 91.47(10) . . ?
C21 N2 Zn 137.16(13) . . ?
N2 C21 C22 112.26(15) . . ?
N2 C21 H21A 109.2 . . ?
C22 C21 H21A 109.2 . . ?
N2 C21 H21B 109.2 . . ?
C22 C21 H21B 109.2 . . ?
H21A C21 H21B 107.9 . . ?
C23 C22 C27 116.65(18) . . ?
C23 C22 C21 122.47(19) . . ?
C27 C22 C21 120.86(19) . . ?
F21 C23 C24 118.06(19) . . ?
F21 C23 C22 118.12(17) . . ?
C24 C23 C22 123.8(2) . . ?
C24 C25 C26 120.4(2) . . ?
C24 C25 H25 119.8 . . ?
C26 C25 H25 119.8 . . ?
C25 C24 C23 118.2(2) . . ?
C25 C24 H24 120.9 . . ?
C23 C24 H24 120.9 . . ?
C25 C26 C27 119.9(2) . . ?
C25 C26 H26 120.0 . . ?
C27 C26 H26 120.0 . . ?
C26 C27 C22 121.0(2) . . ?
C26 C27 H27 119.5 . . ?
C22 C27 H27 119.5 . . ?
N3 C3 N2 105.41(14) . . ?
N3 C3 H3A 110.7 . . ?
N2 C3 H3A 110.7 . . ?
N3 C3 H3B 110.7 . . ?
N2 C3 H3B 110.7 . . ?
H3A C3 H3B 108.8 . . ?
C3 N3 C1 109.75(14) . . ?
C3 N3 C31 113.23(14) . . ?
C1 N3 C31 111.40(14) . . ?
C3 N3 Zn 91.99(10) . . ?
C1 N3 Zn 91.67(10) . . ?
C31 N3 Zn 135.51(12) . . ?
N3 C31 C32 111.79(15) . . ?
N3 C31 H31A 109.3 . . ?
C32 C31 H31A 109.3 . . ?
N3 C31 H31B 109.3 . . ?
C32 C31 H31B 109.3 . . ?
H31A C31 H31B 107.9 . . ?
C33 C32 C37 116.46(18) . . ?
C33 C32 C31 122.35(18) . . ?
C37 C32 C31 121.19(18) . . ?
F31 C33 C32 118.04(18) . . ?
F31 C33 C34 118.09(19) . . ?
C32 C33 C34 123.9(2) . . ?
C35 C34 C33 118.0(2) . . ?
C35 C34 H34 121.0 . . ?
C33 C34 H34 121.0 . . ?
C34 C35 C36 120.3(2) . . ?
C34 C35 H35 119.8 . . ?
C36 C35 H35 119.8 . . ?
C35 C36 C37 120.0(2) . . ?
C35 C36 H36 120.0 . . ?
C37 C36 H36 120.0 . . ?
C36 C37 C32 121.4(2) . . ?
C36 C37 H37 119.3 . . ?
C32 C37 H37 119.3 . . ?
C4 N4 Zn 168.62(18) . . ?
N4 C4 C5 179.4(2) . . ?
C4 C5 H5A 109.5 . . ?
C4 C5 H5B 109.5 . . ?
H5A C5 H5B 109.5 . . ?
C4 C5 H5C 109.5 . . ?
H5A C5 H5C 109.5 . . ?
H5B C5 H5C 109.5 . . ?
C6 N5 Zn 160(3) . . ?
N5 C6 C7 173.9(18) . . ?
C6A N5A Zn 166(3) . . ?
N5A C6A C7A 174.9(19) . . ?
C6A C7A H7D 109.5 . . ?
C6A C7A H7E 109.5 . . ?
H7D C7A H7E 109.5 . . ?
C6A C7A H7F 109.5 . . ?
H7D C7A H7F 109.5 . . ?
H7E C7A H7F 109.5 . . ?
C8 N6 Zn 173.17(17) . . ?
N6 C8 C9 179.5(3) . . ?
C8 C9 H9A 109.5 . . ?
C8 C9 H9B 109.5 . . ?
H9A C9 H9B 109.5 . . ?
C8 C9 H9C 109.5 . . ?
H9A C9 H9C 109.5 . . ?
H9B C9 H9C 109.5 . . ?
F3 B1 F2 93.0(10) . . ?
F3 B1 F4 113.0(10) . . ?
F2 B1 F4 110.6(9) . . ?
F3 B1 F1 116.1(10) . . ?
F2 B1 F1 115.6(9) . . ?
F4 B1 F1 108.0(9) . . ?
F8 B2 F5 117.0(8) . . ?
F8 B2 F6 109.5(11) . . ?
F5 B2 F6 95.0(10) . . ?
F8 B2 F7 117.0(10) . . ?
F5 B2 F7 111.8(11) . . ?
F6 B2 F7 103.1(8) . . ?
F1A B1A F2A 111.8(10) . . ?
F1A B1A F4A 103.0(8) . . ?
F2A B1A F4A 107.2(10) . . ?
F1A B1A F3A 100.0(8) . . ?
F2A B1A F3A 111.2(10) . . ?
F4A B1A F3A 123.0(8) . . ?
F8A B2A F6A 117.1(12) . . ?
F8A B2A F7A 100.8(10) . . ?
F6A B2A F7A 106.9(10) . . ?
F8A B2A F5A 100.3(10) . . ?
F6A B2A F5A 116.1(10) . . ?
F7A B2A F5A 114.9(10) . . ?
 
_diffrn_measured_fraction_theta_max    0.988
_diffrn_reflns_theta_full              27.51
_diffrn_measured_fraction_theta_full   0.988
_refine_diff_density_max    0.529
_refine_diff_density_min   -0.699
_refine_diff_density_rms    0.119
